# Supplementary material for: Conditional Inactivation ofPtenwithEGFROverexpression in Schwann Cells Models Sporadic MPNST
Source: Hindawi journal article supplement (doi:10.1155/2012/620834), 2012-01-01
Supplement: f1 [file 620834.f1.pdf]

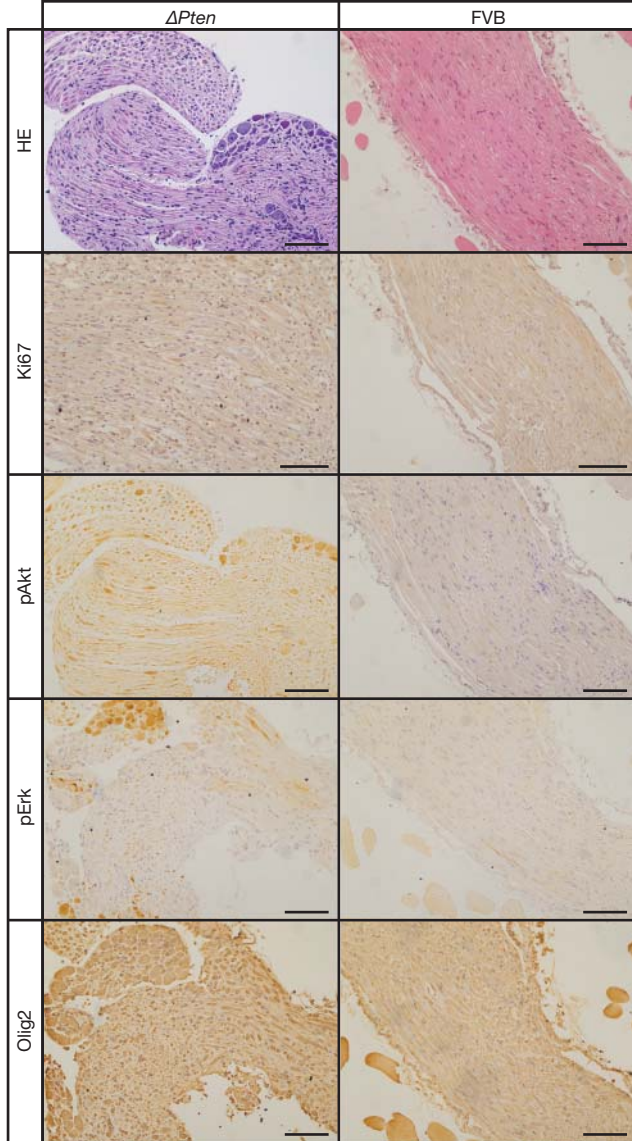

**Supplementary Figure 1** Histological and immunohistochemical (IHC) analyses of peripheral nervous system phenotype. Standard hematoxylin-eosin staining (HE) was performed on all peripheral nervous system tissue sections. IHC staining using antibodies against the proliferative marker (Ki67), activated *Pi3k/Akt* signaling by phospho-Akt (pAkt), activated *Ras/Mapk/Erk* signaling by phospho-Erk1/2 (pErk) and the Schwann cell/oligodendrocyte lineage marker (Olig2). Representative peripheral nervous system tissues taken from *Dhh-Cre; Pten<sup>lox/flox</sup>* ( $\Delta Pten$ ) and wild-type FVB/N (FVB) animals. Scale bars, 100  $\mu\text{m}$ .
